# Supplementary material for: IVIVE: Facilitating the Use of In Vitro Toxicity Data in Risk Assessment and Decision Making
Source: Toxics. 2022 May 1;10(5):232. doi: 10.3390/toxics10050232 (PMC9143724; doi:10.3390/toxics10050232)
Supplement: Supplementary file 1 [file toxics-10-00232-s001.zip › IVIVEms_Supp_software-tools-pk-pbpk-ivive_Final.xlsx]

## Sheet: Software
Software Name	Developer	Chemical, Chemical Class(es) the method was developed for	Tool type	What does the developer say it will do?	Default PBPK Structure	Population variability	Batch Mode	Graphic User Interface	Availability	Weblink	Reference	PK/PBPK Modeling Example	IVIVE of Dosimetry Example	Agency/groups indicating that they use this software	Limitation or Area to improve
acslX	AEgis Technologies Group, Inc.	Not specified	Modeling platform	acslX is a modeling, execution, and analysis environment for continuous dynamic systems and processes. Models are specified using either familiar block diagram notation, or code-based descriptions using the CSL modeling language. It is one of the first commercially available modeling and simulation tools designed for simulating continuous systems.	No	No	NA	Yes	Proprietary	https://web.archive.org/web/20160109094324/http://acslx.com/					The AEgis stopped technique support to acslX. The Sale of New Licenses has Ended as of November 24, 2015
ADAPT 5	University of Southern California	Not specified	Modeling platform	ADAPT is a computational modeling platform developed for pharmacokinetic and pharmacodynamic applications; performs simulations, non linear regression, and optimal sampling.	NA	Yes	NA	No	Free	http://bmsr.usc.edu/
Amitage model	Amitage et al	Not specified	In vitro mass distribution model	The model calculates mass distribution of a chemical within the in vitro test system at equilibrium, considering critical components of in vitro assay system (e.g., % serum in media, media volume, cell number, etc.) and the physicochemical properties of the test article.	NA	NA	Yes	No	Free, through Httk R package		Armitage et al, 2014
Berkeley‐Madonna	University of California	Not specified	Modeling platform	A general purpose differential equations solver	NA	Yes	Yes	Yes	Proprietary	http://www.berkeleymadonna.com
Biokmod	University of Salamanca	Not specified	Mathematica toolbox	Mathematica toolbox for solving system of differential equations, fitting coefficients, convolution, and more, with application for modeling Linear and Nonlinear Biokinetic Systems. This toolbox consist in Mathematica packages and tutorials. It included the current ICRP biokinetic models.	NA	NA	NA	NA	NA	https://diarium.usal.es/guillermo/biokmod/	Lopez-Fidalgo J. G. Sanchez. ”Optimal bioassay time allocations for multiple accidental chronic intakes of radioactive particles“ Stochastic Environmental Research and Risk Assessment. March 2019, Volume 33, Issue 3, pp 905–914 |.
BIOKMODWEB	University of Salamanca	Not specified	A web-based application for solving compartmental models	A web-based application with some of the feactures of Biokmod	No	NA	NA	NA	NA	https://diarium.usal.es/guillermo/biokmod/
Cloe PK	Cyprotex Ltd	Pharmaceuticals	PBPK Modeling	Cloe® PK is an innovative software system that uses PBPK in silico modeling for pharmacokinetic simulation. The software integrates ADME and physicochemical data to simulate drug exposure and duration of drugs in blood, major tissues and organs as well as the prediction of key parameters such as absorption, clearance, half-life, volume of distribution and bioavailability.	Yes	NA	NA	NA	Cyprotex can run Cloe PK predictions on your behalf.	http://www.cyprotex.com/cloepredict/
COSMOS KNIME Workflows	French National Institue for Industrial Environment and Risks (INERIS)	Cosmetics Ingredients	Biokinetics models	PBK models to simulate concentration-time profiles and internal dose metrics for dermal or oral scenarios	NA	NA	NA	NA	Free	http://archive.cosmostox.org/home/welcome/index.html	Bois, et al, 2017, https://doi.org/10.1016/j.tox.2016.05.026	Paini et al, 2017, DOI: 10.1016/j.tiv.2017.06.015			The COSMOS KNIME WebPortal link doesn't work
Edsim++	Medimatics	Not specified	PK/PD modeling tool	An object oriented visual pharmacokinetic pharmacodynamics (PK/PD) modeling tool. Its elegant and innovative user interface makes the software extremely simple to use so that it is well suited for teaching pharmacokinetics. Edsim++ is equipped with a large number of advanced PKPD objects that can be used for building complex models as required in a research environment.	NA	NA	NA	Yes	Proprietary	http://www.medimatics.net/resources
Excel/VBA	Microsoft	Not specified	A spreadsheet features data analysis, graphing tools, and a macro programming language (Visual Basic for Applications)	VBA is an object based programming language used in conjunction with Excel to extend the capability of the software applications.	NA	NA	NA	No	Proprietary	https://www.microsoft.com/en-us/microsoft-365/excel	Dale J. Marino (2005), Toxicology Mechanisms and Methods, 15:2, 137-154, DOI: 10.1080/15376520590918810
Fischer Model	Fischer et al	Not specified	In vitro mass distribution model	An equilibrium partitioning model that modeled freely dissolved, cellular, and membrane concentrations in Tox21 GeneBLAzer bioassays for a set of organic chemicals. The model provides all relevant system parameters and a generic bioassay setup using an excel workbook that can readily be applied to diverse in vitro bioassays.	NA	NA	Yes	Excel	Free		Fischer et al, 2017
Gastroplus + Admet Predictor	Simulations Plus	Pharmaceuticals	PBPK Modeling, Easy reverse dosimetry	Drug-drug interaction, PBPK, ADME predictions, multiple dose routes, metabolism and transporter, biologics, PD, PK, IVIVC	Yes	Yes	Yes	Yes	Proprietary, but inexpensive for research	https://www.simulations-plus.com/	Lukacova et al., 2009		Casey WM et al. 2018, https://ehp.niehs.nih.gov/doi/10.1289/ehp1655	NICEATM
GNU MCSim	French National Institue for Industrial Environment and Risks (INERIS)	Developed with 50 chemicals known to have biologically active metabolites	Simulate SBML models; perform Monte Carlo stochastic simulations,	GNU MCSim recognizes compartments defined in SBML models, maps them to the PBPK template compartments, and automatically locates the specified biochemical reactions in the correct organs. The substances placed (in SBML) outside of any physiological compartment are automatically distributed in all the compartments of the template PBPK model.	NA	Yes	Yes	No	Free, GNU General Public License	https://www.gnu.org/software/mcsim/	Bois F., 2009, GNU MCSim: Bayesian statistical inference for SBML-coded systems biology models Bioinformatics, 25:1453-1454, doi: 10.1093/bioinformatics/btp162.	Tsiros P, et al, J Pharmacokinet Pharmacodyn. 2019 Apr;46(2):173-192. doi: 10.1007/s10928-019-09630-x		NA
httk R package	EPA	Pharmaceutical and ToxCast chemicals	PBPK Modeling, Easy reverse dosimetry	R package designed to perform IVIVE and other TK analyses on ToxCast data	Yes	Yes	Yes	No	Free	https://cran.r-project.org/web/packages/httk/index.html	Pearce et al, 2017		Casey WM et al. 2018, https://ehp.niehs.nih.gov/doi/10.1289/ehp1655	EPA, NICEATM	not include non-linear kinetics for metabolism
ICE Tools (PBPK + IVIVE)	NICEATM	Pharmaceuticals, Environmental chemicals	A web-based application PBPK modeling and Reverse dosimetry tool	A web-based application to perform IVIVE using curated Tox21/ToxCast in vitro assay data or user input data; also provided tool for PBPK modeling for IV, oral and gas routes	Yes	Yes	Yes	Yes	Free	https://ice.ntp.niehs.nih.gov/Tools	Bell, et al, 2020		https://premierpublishers.org/ijteh/160920201841.pdf	NICEATM
IndusChemFate	Cefic LRI	Environmental chemicals	PBPK Modeling	Generic PBTK model tool	Yes	No	No	Excel	Free	http://cefic-lri.org/toolbox/induschemfate/	Jongeneelen et al., 2003		NA	NA
KINETICA	Thermo Fisher Scientific; Philadelphia, PA, USA	Not specified	General PK modeling software	PK/PD and non-compartmental data analysis, simulation and reporting. A unique template format lets users reuse and share standardized settings streamlining decision making and ensuring more consistent results	Yes	Yes	NA	Yes	Proprietary	https://www.kinetica.com/	Alzoubi KH, et al, (2018), Pharmacokinetic evaluation of D-ribose after oral and intravenous administration to healthy rabbits. Clin Pharmacol. doi: 10.2147/CPAA.S167150. PMID: 29928149; PMCID: PMC6003283.
Magnolia	Magnolia	Not specified	Modeling platform	An environment for modeling systems whose behavior can be described by systems of differential equations. Modeling language heavily influenced by ACSL/acslX	No	NA	Yes	No	Free	https://www.magnoliasci.com/
MATHEMATICA	Wolfram	Not specified	General mathematical and engineering modeling software	Mathematica provides the principal computation environment	NA	NA	NA	NA	Proprietary	https://demonstrations.wolfram.com/PharmacokineticModeling/
MATLAB‐simulink	The Mathworks Inc.	Not specified	Modeling platform	A MATLAB-based graphical programming environment for modeling, simulating and analyzing multidomain dynamical systems. Its primary interface is a graphical block diagramming tool and a customizable set of block libraries.	NA	Yes	Yes	No	Proprietary	http://www.mathworks.com
MEDICI‐PK	Computing in Technology	Pharmaceuticals	PBPK Modeling	MEDICI-PK is a modular, transparent, application-specific and user-friendly software tool that supports the process of PK and pharmacodynamic (PD) modeling in an open way.	Yes	NA	NA	Yes	Proprietary	http://www.cit‐wulkow.de/	Huissinga W, 2006, https://doi.org/10.1016/j.drudis.2006.07.001
MEGen (Model Equation Generator)	UK Health and Safety Laboratory	Not specified	PBPK Modeling	A ‘proof of concept’ intuitive user interface for the rapid generation and analysis of PBPK models	Yes	No	NA	Yes	Free	http://cefic-lri.org/toolbox/pbpkmegen/	Loizou et al., 2011 https://doi.org/10.3389/fphar.2011.00056		NA	NA	the site ( http://xnet.hsl.gov.uk/megen) currently has expired security certificates, use at your own risk
NONMEM	University of California/ICON Development Solutions	Pharmaceuticals	Model analysis program	A nonlinear mixed effects modelling tool for population PD/PK. NONMEM provides a flexible library of pre-written models to solve pharmacokinetic problems.	NA	Yes	Yes	NA	Proprietary	https://www.iconplc.com/innovation/nonmem/
Percepta	ACD Labs	Pharmaceuticals	In silico models	In silico Prediction of Physicochemical, ADME, and Toxicity Properties	NA	NA	NA	Yse	Proprietary	https://www.acdlabs.com/products/percepta/index.php
Phoenix WinNonlin	Certara	Pharmaceuticals	Compartmental Modeling Tools	Provides non-compartmental analysis (NCA), pharmacokinetic/pharmacodynamic (PK/PD), and toxicokinetic (TK) modeling. Comes with an IVIVC module specifically for IVIVE	NA	NA	Yes	Yes	Proprietary	https://www.certara.com/software/phoenix-winnonlin/; https://www.youtube.com/watch?v=QklK2XQoC5M	CERTARA LP (2016) Phoenix WinNonlin 8.1: The Industry Standard for NCA and PK/PD Modeling and Simulation. In: Certara USA Inc.	Nasiri MI, et al 2018. Drug Dev Ind Pharm. 2019 Mar;45(3):415-422. doi: 10.1080/03639045.2018.1546312.	in vitro dissolution characteristics of a drug -> bioequivalance study	US FDA
PKBugs	University of Cambridge	Not specified	Efficient and user-friendly interface for specifying complex population (PK/PD) models within WinBUGS software.	An add-on to WinBUGS that fits pharmacokinetic models	NA	Yes	NA	Yes	Free	https://www.mrc-bsu.cam.ac.uk/software/bugs/the-bugs-project-winbugs/winbugs-development/pkbugs-an-efficient-interface-for-population-pk-pd-within-winbugs/					No longer maintained, but still made available for download
PKQUEST	University of Minnesota	China Pharmaceutical University	PBPK Modeling	Freely distributed Java based PK software package.﻿ User friendly PK and graphical software with built in Physiologically Based Pharmacokinetic, Deconvolution, Non-compartment PK and much more. Emphasis on application to human clinical PK data. Each specific drug example saved as Excel file that can be used as template for your own data	Yes	NA	NA	Yes	Free	http://www.pkquest.com/
PK-Sim	Open Systems Pharmacology	Pharmaceuticals	PBPK Modeling, Easy reverse dosimetry	Generic PK modelling	Yes	Yes	Yes	Yes	Free	http://www.open-systems-pharmacology.org/	Eissing et al., 2011		NA	NA
PKSolver	China Pharmaceutical University	Not specified	PK/PD modeling tool	A freely available menu-driven add-in program for Microsoft Excel written in Visual Basic for Applications (VBA), for solving basic problems in pharmacokinetic (PK) and pharmacodynamic (PD) data analysis.	NA	NA	NA	No	free		Yong, Z et al (2010). PKSolver: An add-in program for pharmacokinetic and pharmacodynamic data analysis in Microsoft Excel. Computer methods and programs in biomedicine. 99. 306-14. DOI: 10.1016/j.cmpb.2010.01.007.
Pmetrics	University of Southern California	Pharmaceuticals	PK/PD modeling tool	An R package to perform non-parametric and parametric pharmacokinetic-pharmacodynamic population and individual modeling and simulation. It is primarily designed for pharmacometric researchers.	No	Yes	Yes	No	Free	http://www.lapk.org/pmetrics.php	Neely MN, van Guilder MG, Yamada WM, Schumitzky A, Jelliffe RW. Accurate detection of outliers and subpopulations with Pmetrics, a nonparametric and parametric pharmacometric modeling and simulation package for R. Ther Drug Monit. 2012 Aug;34(4):467-76. doi: 10.1097/FTD.0b013e31825c4ba6. PMID: 22722776; PMCID: PMC3394880.
QIVIVE tools	Wageningen Food Safety Research	Not specified	A web-based PBK-model development tool, and QIVIVE	A web-based toolbox to support quantitative in vitro-to-in vivo extrapolations (QIVIVE)	Yes	No	No	Yes	Free	https://www.qivivetools.wur.nl/	Punt, et al, 2020. 10.1021/acs.chemrestox.0c00307	Punt, et al, 2020. 10.1021/acs.chemrestox.0c00307	Punt, et al, 2020. 10.1021/acs.chemrestox.0c00307
SAAM II	University of Washington	Not specified	General PK modeling software	SAAM II is a modeling, simulation, and analysis software package which supports the development and statistical calibration of compartmental models in biological, metabolic, and pharmaceutical systems.	Yes	Yes	Yes	Yes	Proprietary	https://tegvirginia.com/software/saam-ii-popkinetics/	Barrett PH, et al. SAAM II: Simulation, Analysis, and Modeling Software for tracer and pharmacokinetic studies. Metabolism. 1998 Apr;47(4):484-92. doi: 10.1016/s0026-0495(98)90064-6. PMID: 9550550.
Simcyp	Certara	Pharmaceuticals	PBPK Modeling, Easy reverse dosimetry	Metabolism/transporter, In Vitro Distribution, PK modelling	Yes	Yes	Yes	Yes	Proprietary, but inexpensive for research	https://www.certara.com/software/simcyp-pbpk/	Jamel et al., 2009, doi:10.1517/17425250802691074		NA	EPA, NIEHS
Stan	The Stan Development Team (https://mc-stan.org/about/team/)	Not specified	Bayesian software tools	Stan is a state-of-the-art platform for statistical modeling and high-performance statistical computation. Thousands of users rely on Stan for statistical modeling, data analysis, and prediction in the social, biological, and physical sciences, engineering, and business.	No	Yes	Yes	Bo	Free	https://mc-stan.org/	Tsiros et al, Population pharmacokinetic reanalysis of a Diazepam PBPK model: a comparison of Stan and GNU MCSim, (2019) DOI:10.1007/s10928-019-09630-x	Tsiros P, et al, J Pharmacokinet Pharmacodyn. 2019 Apr;46(2):173-192. doi: 10.1007/s10928-019-09630-x
STELLA		Not specified	General mathematical and engineering modeling software	Visual programming language for system dynamics; The program, distributed by isee systems (formerly High Performance Systems) allows users to run models created as graphical representations of a system using four fundamental building blocks. STELLA has been used in academia as a teaching tool and has been utilized in a variety of research and business applications.	No	NA	No	Yes	Proprietary, but inexpensive for research	https://en.wikipedia.org/wiki/STELLA_(programming_language)#cite_note-18	Richmond, B. (1985). STELLA: Software for Bringing System Dynamics to the Other 98% (PDF). The 3rd International Conference of the System Dynamics Society. Keystone, CO. pp. 706–718.
TKPlate	European Food Safety Authority (EFSA)	Chemicals in food and animal feed	Toxicokinetic Modelling Platform	A Toxicokinetic Modelling Platform under development in EFSA	NA	Yes	NA	NA	Free		Testai et al, 2021, Modelling human variability in toxicokinetic and toxicodynamic processes using Bayesian meta‐analysis, physiologically‐based modelling and in vitro systems, https://doi.org/10.2903/sp.efsa.2021.EN-6504
WinBUGS/OpenBUGS	University of Cambridge and the Imperial College School of Medicine at St Mary’s	Not specified	General PK modeling software	A Bayesian modelling framework that can be used to analyse, using Markov chain Monte Carlo (MCMC) techniques, arbitrarily complex Bayesian full probability models	NA	Yes	NA	Yes	Free	https://www.mrc-bsu.cam.ac.uk/software/bugs/the-bugs-project-winbugs/	Lunn, D.J., Thomas, A., Best, N., and Spiegelhalter, D. (2000) WinBUGS — a Bayesian modelling framework: concepts, structure, and extensibility. Statistics and Computing, 10:325–337.
Other resources				List of pharmacokinetic software						https://www.pharmpk.com/soft.html
Other resources				List of computer simulation software						https://en.wikipedia.org/wiki/List_of_computer_simulation_software
Other resources				Table of system dynamics software						https://en.wikipedia.org/wiki/Comparison_of_system_dynamics_software
